# Supplementary material for: Loss of ERα induces amoeboid-like migration of breast cancer cells by downregulating vinculin
Source: PubMed Central journal article supplement (PMC5344302; doi:10.1038/ncomms14483), 2017-03-07
Supplement: ncomms14483-s1.pdf [file ncomms14483-s1.pdf]

**Supplementary Figures:**

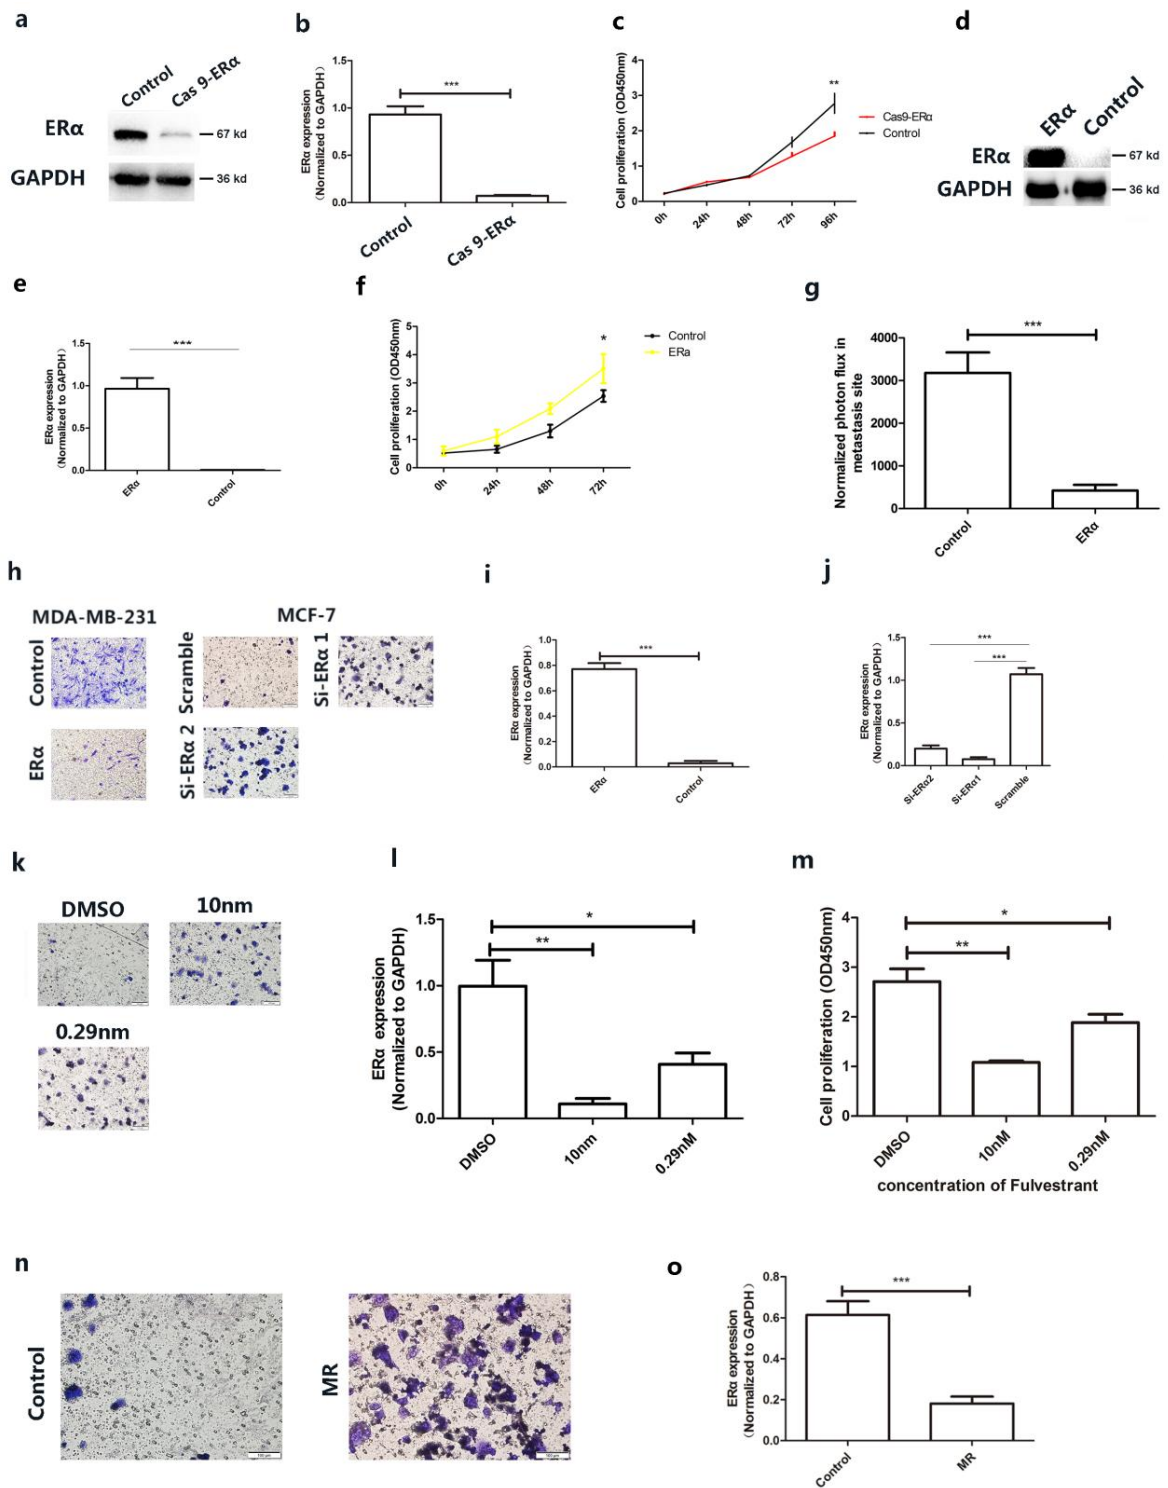

**Supplementary Figure 1**

**Supplementary Figure 1: ERα inhibits breast cancer metastasis *in vivo* and *in vitro*. Related to figure 2.**

**(a)** Western blot assay for detecting the expression levels

of ER $\alpha$  in control and Cas9-ER $\alpha$  MCF-7 cells. **(b)** Quantification of ER $\alpha$  expression in control and Cas9-ER $\alpha$  MCF-7 cells normalized to GAPDH (n=3). **(c)** Cell proliferation assay for detecting the proliferative capability of control and Cas9-ER $\alpha$  MCF-7 cells (n=3). **(d)** Western blot assay for detecting the expression levels of ER $\alpha$  in MDA-MB-231-luc2-vector or MDA-MB-231-luc2-ER $\alpha$  cells. **(e)** Quantification of ER $\alpha$  expression in the two cell lines normalized to GAPDH (n=3). **(f)** Cell proliferation assay for detecting the proliferative capability of control and ER $\alpha$ -expressing MDA-MB-231 cells (n=3). **(g)** Luciferase counts at the metastasis sites of mice in Figure 2c at week 4. **(h)** A transwell assay was performed to determine the effect of ER $\alpha$  on cell invasion by gain or loss of ER $\alpha$  in MDA-MB-231 or MCF-7 cells. **(i, j)** Quantification of the ER $\alpha$  expression in MDA-MB-231 or MCF-7 cells from Figure 2g (n=3). **(k)** A transwell assay was performed to determine the effect of fulvestrant on the invasive capability of MCF-7 cells. **(l)** Quantification of ER $\alpha$  expression in MCF-7 cells treated with different concentrations of fulvestrant (n=3). **(m)** Cell proliferation assay (96 h) for detecting the proliferative capability of MCF-7 cells treated with different concentrations of fulvestrant (n=3). **(n)** A transwell assay was performed to determine the invasive capability of parental MCF-7 cells and MR cells. **(o)** Quantification of ER $\alpha$  expression in MCF-7 cells and MR cells (n=3). **(b, c, e, f, g, i, j, l, m, o)** Graphs show mean  $\pm$  s.e.m. \* $P$ <0.05 \*\* $P$ <0.01 \*\*\* $P$ <0.001. **(b, c, e, f, g, i, o)** Unpaired  $t$ -test; **(j, l, m)** ANOVA with Dunnett  $t$  test.

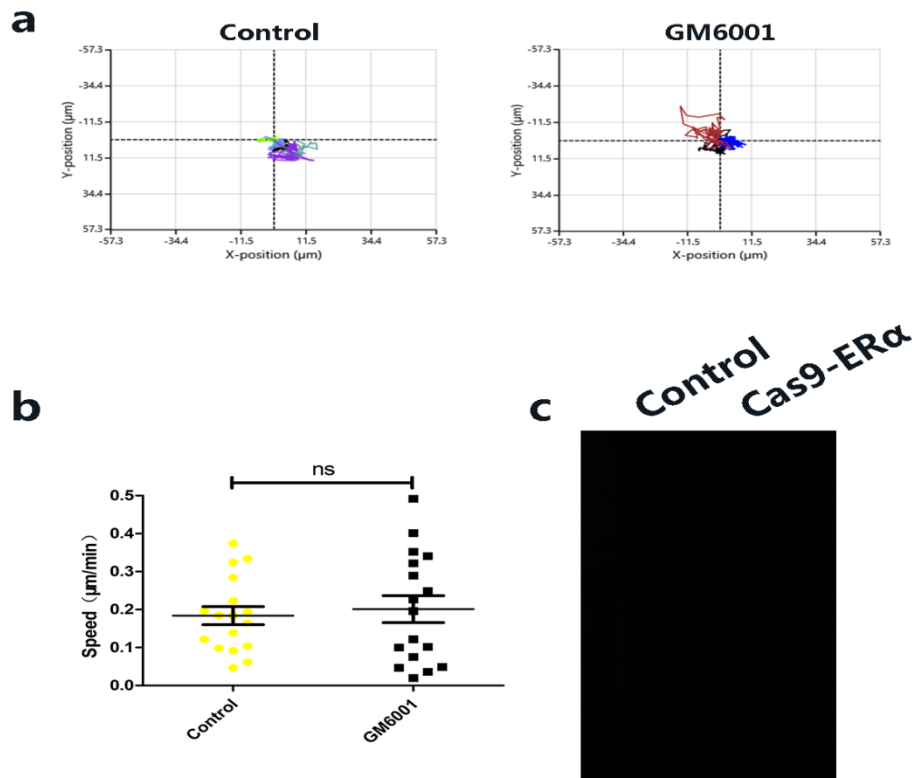

### Supplementary Figure 2

**Supplementary Figure 2: Loss of ER $\alpha$  induces the amoeboid migration of MCF-7 cells. Related to figure 3.** (a) Representative tracks of control MCF-7 cells and GM6001 treated MCF-7 cells (b) The migration speed of control MCF-7 cells and GM6001 treated MCF-7 cells in the 3D matrix (n=17 cells). (c) Conditioned serum-free medium of control or Cas9-ER $\alpha$  MCF-7 cells was collected and used for MMP-2 and MMP-9 activity assessment. (b) Graphs show mean  $\pm$  s.e.m. ns  $P > 0.05$  (b) Unpaired  $t$ -test.

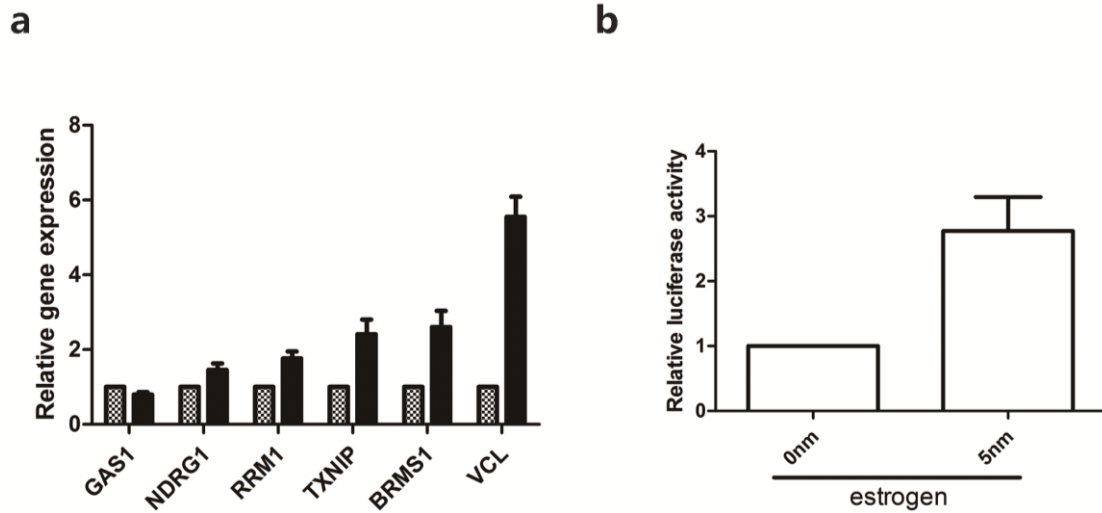

**Supplementary Figure 3**

**Supplementary Figure 3: ER $\alpha$  is a transcriptional promoter of vinculin. Related to figure 4.** (a) Real-time PCR was performed to identify gene expression. The main metastasis-associated genes from RNA-seq sequencing were verified by Real-time PCR assay. (b) Luciferase activity of vinculin promoter was measured in MCF-7 cells that were treated with 0nm or 5nm estrogen.

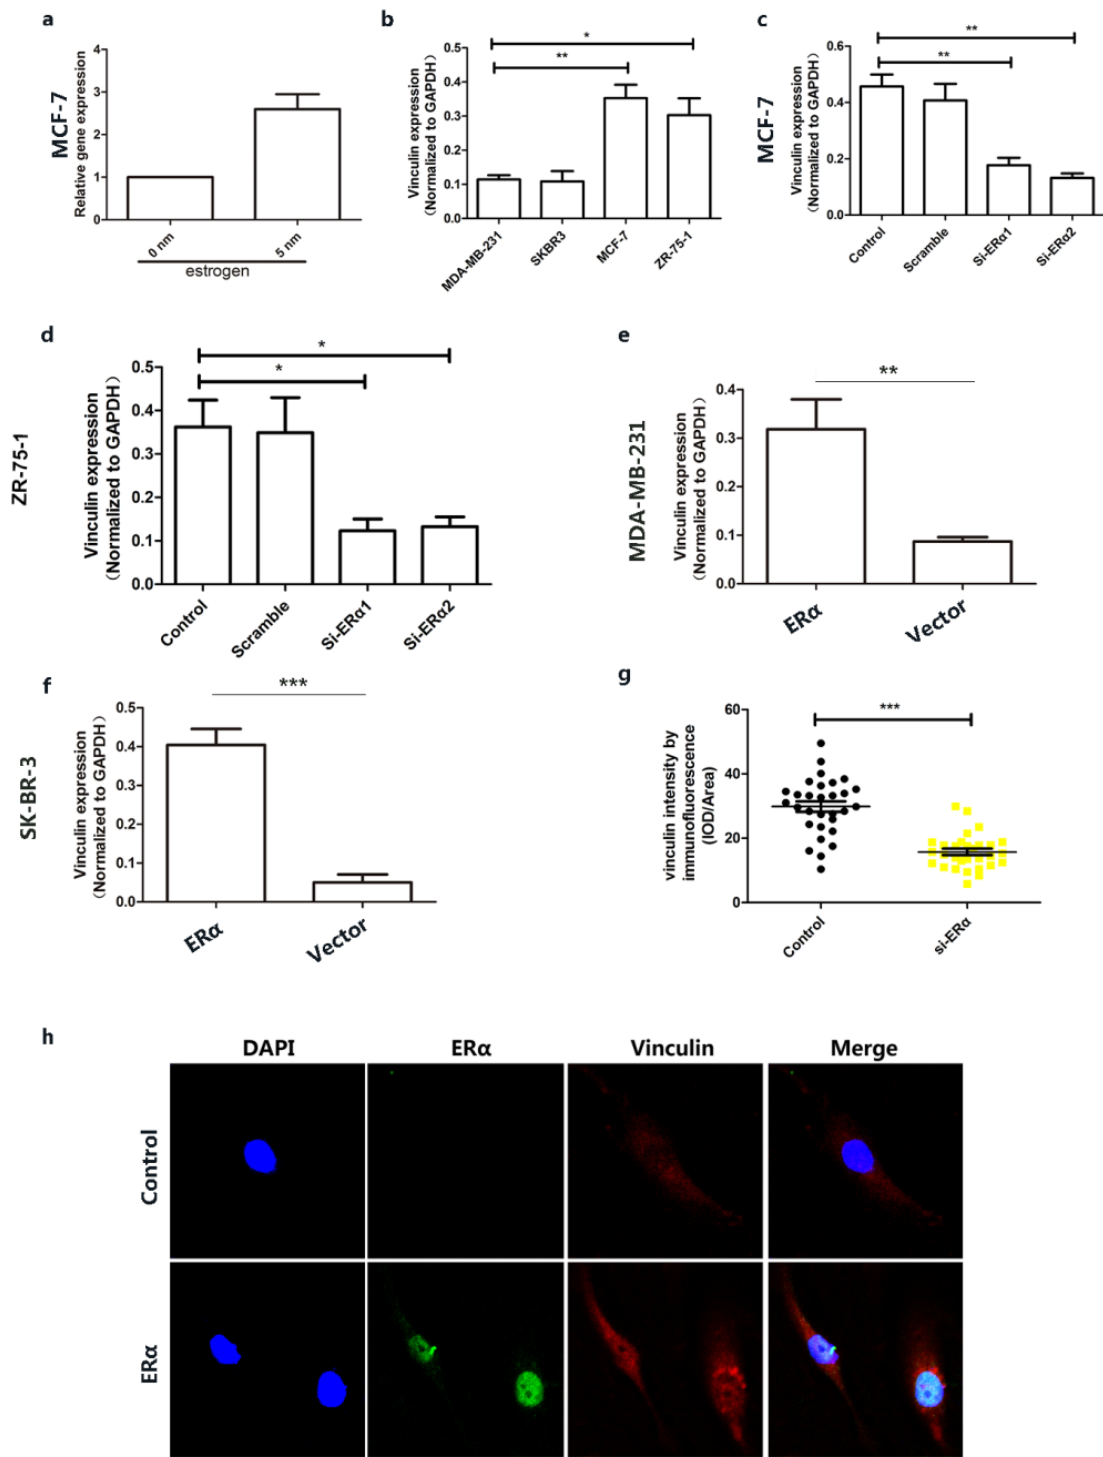

**Supplementary Figure 4**

**Supplementary Figure 4: ERα up-regulates the expression of vinculin in breast cancer cells. Related to figure 5. (a)** Real-time PCR detecting the transcription levels of vinculin in MCF-7 cells that were treated with 0nm or 5nm estrogen. The results

were normalized to GAPDH (n=3). **(b)** Quantification of vinculin expression in four breast cancer cell lines normalized to GAPDH (n=3). **(c)** Quantification of vinculin expression in MCF-7 cells normalized to GAPDH (n=3). **(d)** Quantification of vinculin expression in ZR-75-1 cells normalized to GAPDH (n=3). **(e)** Quantification of vinculin expression in MDA-MB-231 cells normalized to GAPDH (n=3). **(f)** Quantification of vinculin expression in SK-BR-3 cells normalized to GAPDH (n=3). **(g)** Quantification of vinculin expression levels from confocal images of fig.5f (n = 30 cells). **(h)** Confocal assay for ER $\alpha$  localization and vinculin expression in MDA-MB-231 (control or ER $\alpha$ -overexpressing) cells. **(a, b, c, d, e, f, g)** Graphs show mean  $\pm$  s.e.m. \* $P$ <0.05 \*\* $P$ <0.01 \*\*\* $P$ <0.001. **(b, c, d)** ANOVA with Dunnett  $t$  test; **(e, f, g)** Unpaired  $t$ -test.

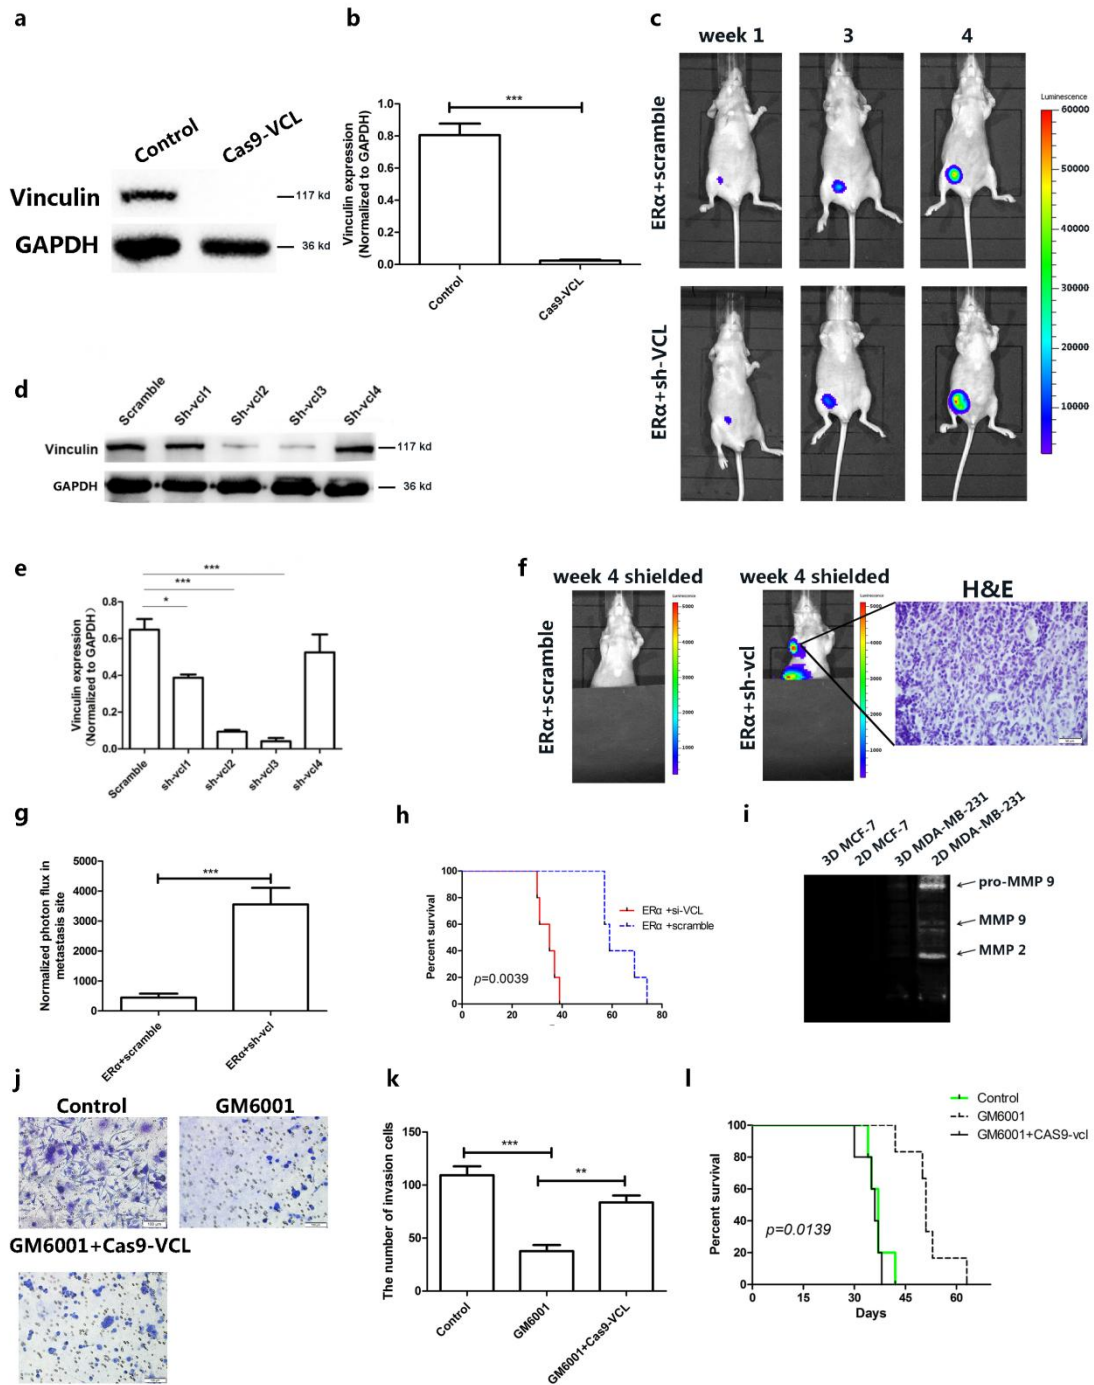

**Supplementary Figure 5**

**Supplementary Figure 5: Vinculin, downstream of ER $\alpha$ , is important for breast cancer metastasis. Related to figure 6. (a) Western blot assay for detecting the expression of vinculin in control or Cas9-VCL MCF-7-Luc2 cells. (b) Quantification of vinculin expression normalized to GAPDH (n=3). ER $\alpha$ -overexpressing**

MDA-MB-231-luc2 cells infected with lentivirus containing vinculin sh-RNA (sh-vcl) or scrambled RNA (scramble) were injected into nude mice to generate xenografts (n=5). (c) Bioluminescence imaging at different time points was used to evaluate tumor progression. (d) Western blot assay for testing the interference efficiency of vinculin shRNAs. (e) Quantification of vinculin expression normalized to GAPDH (n=3). (f) Representative images of the scramble group or the sh-vcl group at week 4 are shown after shielding the primary tumor. The lymphatic metastases were determined by H&E staining. (g) Luciferase counts in the metastasis sites of (c) at week 4. (h) The lifetime of mice injected with scramble or sh-vcl cells. (i) Conditioned serum-free 2D or 3D medium of MDA-MB-231 cells was collected and used for MMP-2 and MMP-9 activity assessment; that of MCF-7 cells was used as a negative control. (j) A transwell assay was performed in MDA-MB-231 cells, GM6001-treated MDA-MB-231 cells or GM6001-treated and CRISPR/Cas9-mediated *VCL* deleted MDA-MB-231 cells. (k) Quantification of invasive cells from (j) (n=3). (l) The lifetime of mice injected with control, GM6001-treated control or Cas9-vinculin MDA-MB-231-luc2 cells. (b, e, g, k) Graphs show mean  $\pm$  s.e.m. \* $P$ <0.05 \*\* $P$ <0.01 \*\*\* $P$ <0.001. (b, g) Unpaired  $t$ -test; (e) ANOVA with Dunnett  $t$  test; (k) ANOVA with Tukey's post hoc test; (h, l) Log-rank test.



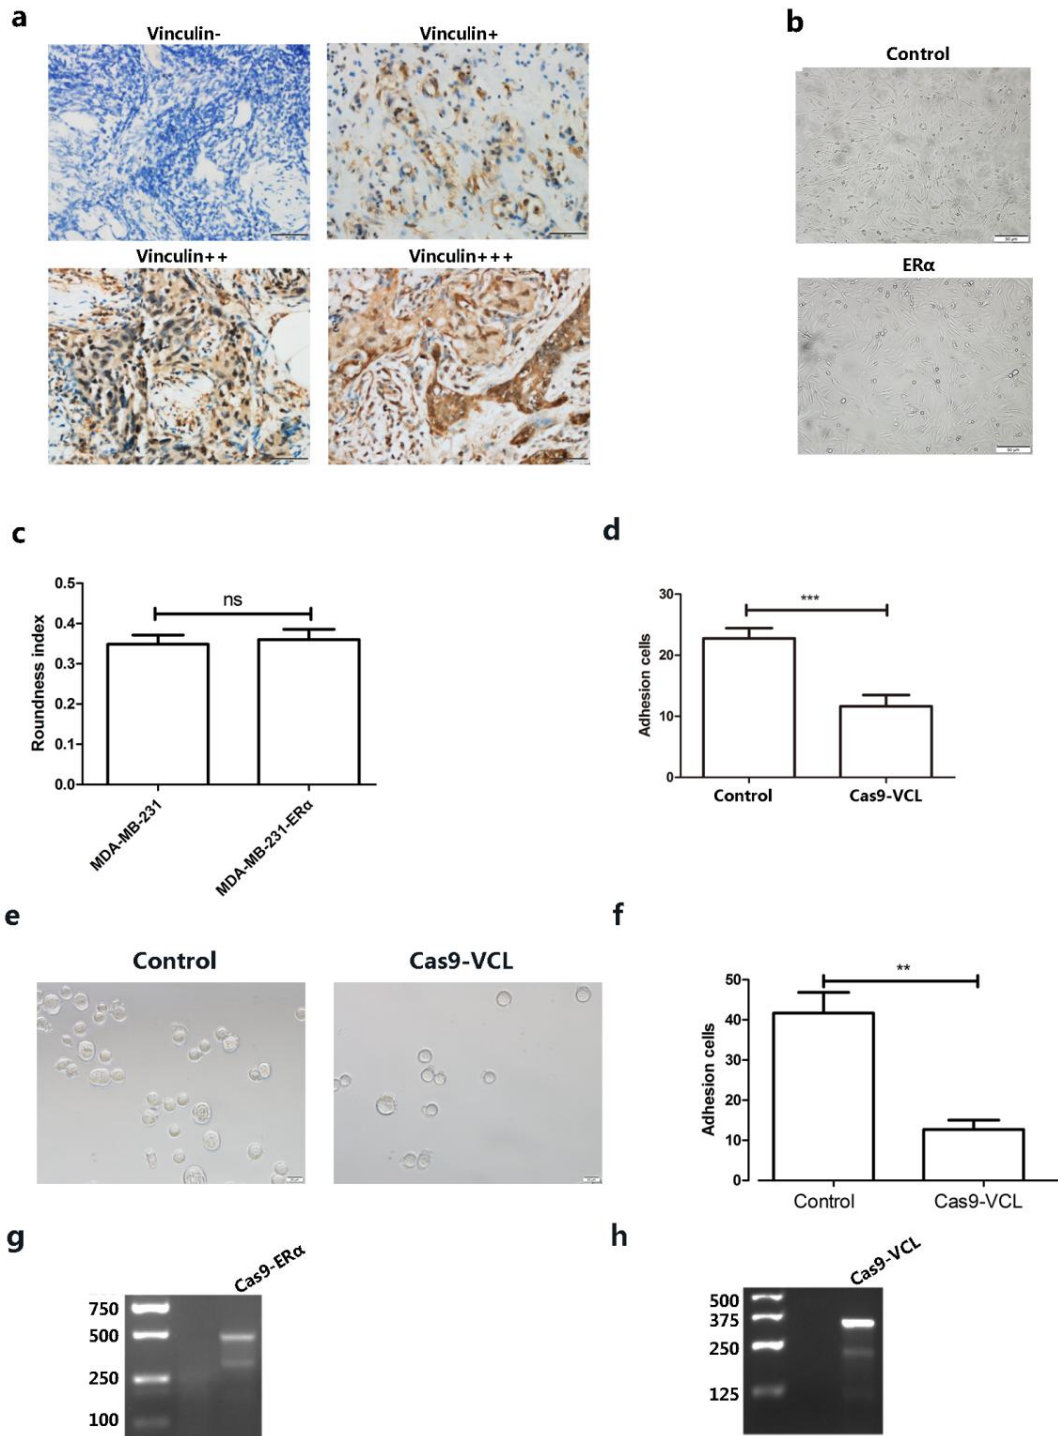

**Supplementary Figure 6**

**Supplementary Figure 6:** (a) Immunohistochemistry was performed using a specific antibody against vinculin. Representative images of vinculin expression levels were shown. Scale bars represent 50  $\mu$ m (40 $\times$ ) (b) Optical microscope was used to observe

the morphology of MDA-MB-231 cells or MDA-MB-231-ER $\alpha$  in 2D substrate. Scale bar represents 50  $\mu\text{m}$  (40 $\times$ ). **(c)** Cell morphology (roundness index) of control or ER $\alpha$ -expressing MDA-MB-231 cells (n=100 cells). **(d)** Quantification of breast cancer cell adhesion to Matrigel after vinculin deletion (n=3). **(e)** Representative images of control MCF-7 cells and Cas9-vinculin MCF-7 cells adhering to E-cadherin-coated substrates from optical microscope. Scale bars represent 20  $\mu\text{m}$  **(f)** Quantification of MCF-7 cells adhering to E-cadherin-coated substrates (n=3). **(g)** Validation of the sgRNA directed against the exon of *ESR1* gene using the Knockout and Mutation Detection Kit. **(h)** Validation of the sgRNA directed against the exon of *VCL* gene using the Knockout and Mutation Detection Kit. **(c, d, f)** Graphs show mean  $\pm$  s.e.m. ns  $P>0.05$ , \*\*  $P<0.01$ , \*\*\* $P<0.001$ ; **(c, d, f)** Unpaired  $t$ -test.

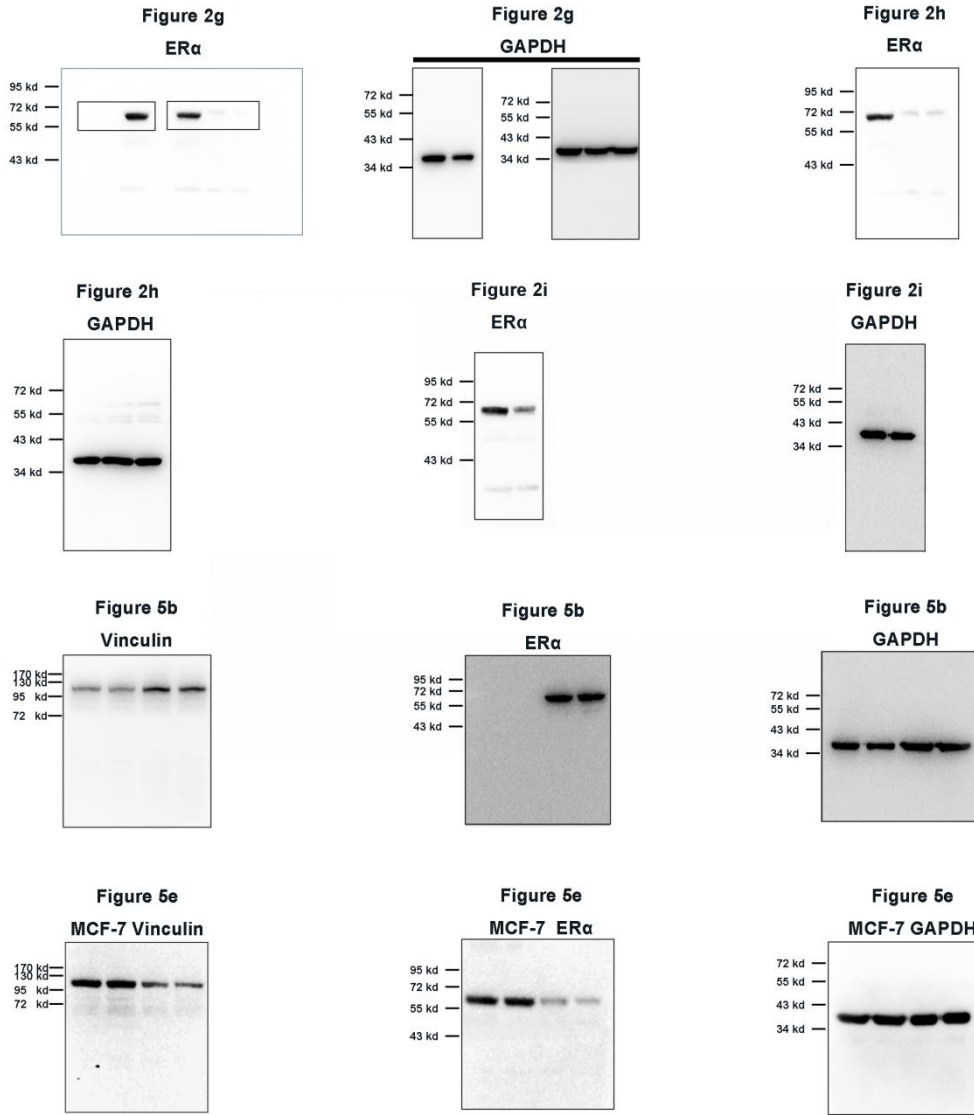

**Supplementary Figure 7**

**Supplementary Figure 7:** Original full scans of Western blots related to respective figures as indicated.

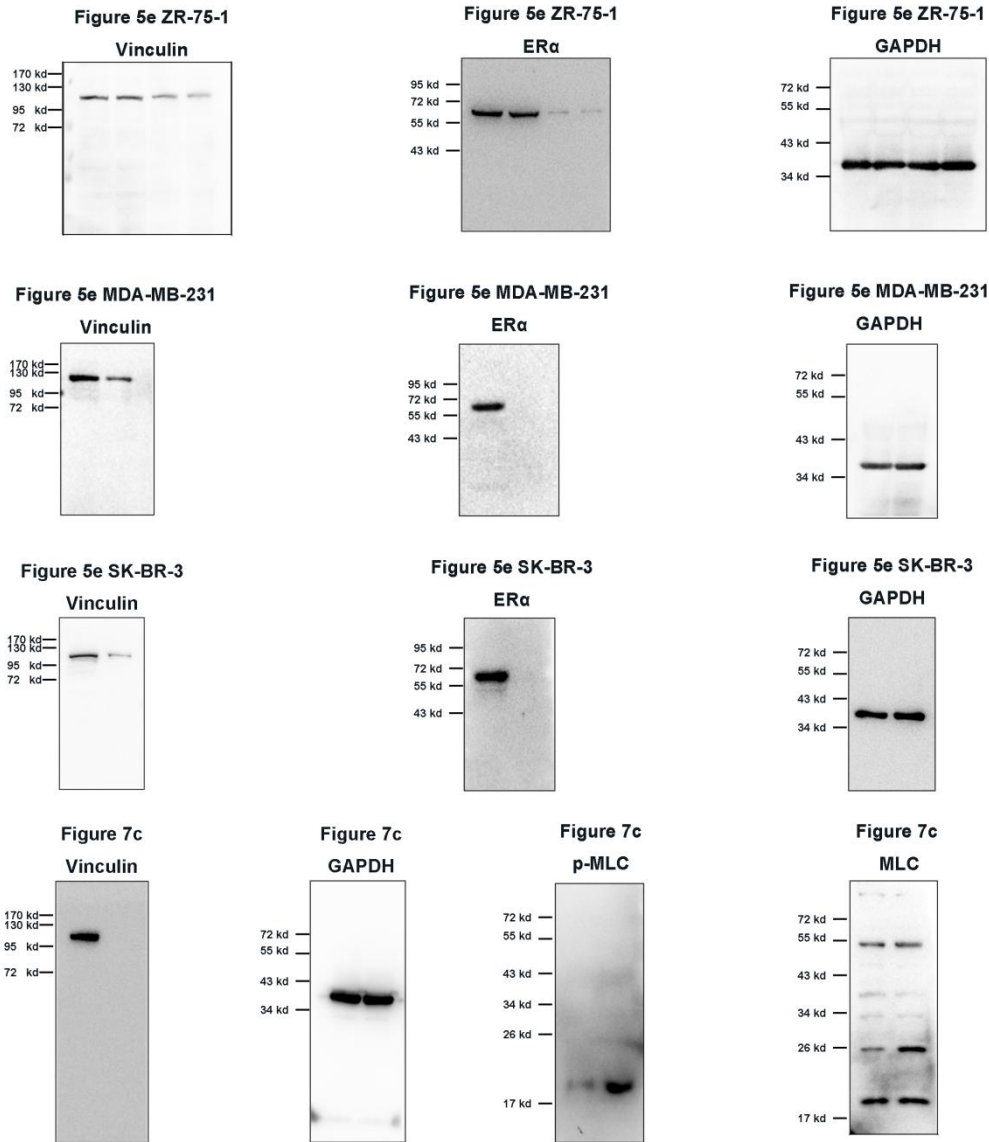

**Supplementary Figure 8**

**Supplementary Figure 8:** Original full scans of Western blots related to respective figures as indicated.

**Supplementary Tables:**

**Supplementary Table 1 The expression level of ER $\alpha$  in primary tumor and lymph node metastasis.**

| <b>ER<math>\alpha</math> Expression level</b> | <b>-</b>  | <b>+</b>  | <b>++</b> | <b>+++</b> |
|-----------------------------------------------|-----------|-----------|-----------|------------|
| <b>Primary tumor</b>                          | <b>0</b>  | <b>35</b> | <b>49</b> | <b>40</b>  |
| <b>Lymphatic metastasis</b>                   | <b>68</b> | <b>21</b> | <b>18</b> | <b>17</b>  |

**Supplementary Table 2 Association between loss of ER $\alpha$  expression and breast carcinoma characteristics**

| Variables             | Total<br>N=124 | Loss of ER $\alpha$ in lymphatic metastasis |      | P-value      |
|-----------------------|----------------|---------------------------------------------|------|--------------|
|                       |                | +                                           | -    |              |
|                       |                | N=68                                        | N=56 |              |
| Age(year)             |                |                                             |      |              |
| >50                   | 68             | 32                                          | 36   | 0.055        |
| $\leq$ 50             | 56             | 36                                          | 20   |              |
| Total                 | 124            | 68                                          | 56   |              |
| Tumor size            |                |                                             |      |              |
| >2 cm                 | 68             | 36                                          | 32   | 0.640        |
| $\leq$ 2 cm           | 56             | 32                                          | 24   |              |
| Total                 | 124            | 68                                          | 56   |              |
| Clinical stages       |                |                                             |      |              |
| AJCC I                | 20             | 6                                           | 14   | <b>0.007</b> |
| AJCC II               | 53             | 28                                          | 25   |              |
| AJCC III              | 51             | 34                                          | 17   |              |
| Total                 | 124            | 68                                          | 56   |              |
| No.of node metastasis |                |                                             |      |              |
| N1: 1 to 3            | 73             | 33                                          | 40   | <b>0.011</b> |
| N2: 4 to 9            | 37             | 25                                          | 12   |              |
| N3: $\geq$ 10         | 14             | 10                                          | 4    |              |
| Total                 | 124            | 68                                          | 56   |              |
| PR status             |                |                                             |      |              |
| PR+                   | 96             | 48                                          | 48   | <b>0.045</b> |
| PR-                   | 28             | 20                                          | 8    |              |
| Total                 | 124            | 68                                          | 56   |              |
| HER2 status           |                |                                             |      |              |
| HER2+                 | 92             | 52                                          | 40   | 0.523        |
| HER2-                 | 32             | 16                                          | 16   |              |
| Total                 | 124            | 68                                          | 56   |              |

Statistical analysis of “Age, Tumor size, PR status, HER2 status” was performed with the chi-square test; Statistical analysis of “Clinical stages, No.of node metastasis” was performed with the Wilcoxon rank sum test.

**Supplementary Table 3 The main significantly altered metastasis-associated genes in RNA-seq**

| Symbol | GeneID | Locus                                | FPKM<br>(T1+T2/2) | FPKM<br>((C1+C2/2) | fold_change (T<br>/ S) | p_value   | fdr      | Full Name                          | Biological<br>_Process                                                                                                                                                                                                                                                                                                                     | Cellular<br>_Component                                                                                                                                                                                                                  | Molecular<br>_Function                                                                                                                                                                                |
|--------|--------|--------------------------------------|-------------------|--------------------|------------------------|-----------|----------|------------------------------------|--------------------------------------------------------------------------------------------------------------------------------------------------------------------------------------------------------------------------------------------------------------------------------------------------------------------------------------------|-----------------------------------------------------------------------------------------------------------------------------------------------------------------------------------------------------------------------------------------|-------------------------------------------------------------------------------------------------------------------------------------------------------------------------------------------------------|
| GAS1   | 2619   | chr9:869<br>44362-86<br>947189       | 3.4752            | 1.3227             | 2.627353141            | 0.0093653 | 0.999958 | growth<br>arrest-specific<br>1     | GO:0000019: negative<br>regulation of protein processing<br>   GO:0000019: cellular<br>response to vascular endothelial<br>growth factor stimulus<br>  GO:0000019: regulation of ER<br>to Golgi vesicle-mediated<br>transport                                                                                                              | GO:0000033:<br>Plasmid membrane                                                                                                                                                                                                         | GO:0000033:<br>negative<br>regulation of<br>mitotic cell<br>cycle  GO:000<br>0037: cell<br>cycle arrest                                                                                               |
| NDRG1  | 10397  | chr8:134<br>249413-1<br>3430954<br>7 | 13.0272           | 4.9679             | 2.622275006            | 0.0080597 | 0.999958 | N-myc<br>downstream<br>regulated 1 | GO:0010038:response to metal<br>ion    GO:0030330:DNA<br>damage response, signal<br>transduction by p53 class<br>mediator   <br>GO:0032287:peripheral<br>nervous system myelin<br>maintenance   <br>GO:0045576:mast cell<br>activation   <br>GO:0071456:cellular response<br>to hypoxia   <br>GO:0090232:positive<br>regulation of spindle | GO:0005634:nucleu<br>s   <br>GO:0005737:cytopl<br>asm   <br>GO:0005813:centros<br>ome   <br>GO:0005829:cytosol<br>  <br>GO:0005874:microt<br>ubule   <br>GO:0005886:plasma<br>membrane   <br>GO:0005913:cell-ce<br>ll adherens junction | GO:0005515:<br>protein<br>binding   <br>GO:0008017:<br>microtubule<br>binding   <br>GO:0017137:<br>Rab GTPase<br>binding   <br>GO:0043015:<br>gamma-tubuli<br>n binding   <br>GO:0045296:<br>cadherin |

|      |      |                               |         |         |             |           |          |                                |                                                                                                                                                                                                                                                                                                                                                                      |                                                                                                                                       |                                                                                                                                                                                                                 |
|------|------|-------------------------------|---------|---------|-------------|-----------|----------|--------------------------------|----------------------------------------------------------------------------------------------------------------------------------------------------------------------------------------------------------------------------------------------------------------------------------------------------------------------------------------------------------------------|---------------------------------------------------------------------------------------------------------------------------------------|-----------------------------------------------------------------------------------------------------------------------------------------------------------------------------------------------------------------|
|      |      |                               |         |         |             |           |          |                                | checkpoint                                                                                                                                                                                                                                                                                                                                                           | <br>GO:0015630:microtubule cytoskeleton   <br>GO:0048471:perinuclear region of cytoplasm   <br>GO:0055038:recycling endosome membrane | binding                                                                                                                                                                                                         |
| RRM1 | 6240 | chr11:41<br>15923-41<br>60106 | 59.7513 | 18.3331 | 3.259203299 | 0.0238978 | 0.999958 | ribonucleotide reductase<br>M1 | GO:0006260:DNA replication   <br>GO:0006260:DNA replication   <br>GO:0009263:deoxyribonucleotide biosynthetic process   <br>GO:0015949:nucleobase-containing small molecule interconversion   <br>GO:0044281:small molecule metabolic process   <br>GO:0051290:protein heterotetramerization   <br>GO:0055086:nucleobase-containing small molecule metabolic process | GO:0005654:nucleoplasm   <br>GO:0005829:cytosol   <br>GO:0005971:ribonucleoside-diphosphate reductase complex                         | GO:0004748:ribonucleoside-diphosphate reductase activity, thioredoxin disulfide as acceptor   <br>GO:0004748:ribonucleoside-diphosphate reductase activity, thioredoxin disulfide as acceptor   <br>GO:0005515: |



|       |       |                           |         |         |             |           |          |                                 |                                                                                                                                                                                                                                                                                                                                                                                                                                                                                                                                                                    |                                                                                                                  |                                                                                                                   |
|-------|-------|---------------------------|---------|---------|-------------|-----------|----------|---------------------------------|--------------------------------------------------------------------------------------------------------------------------------------------------------------------------------------------------------------------------------------------------------------------------------------------------------------------------------------------------------------------------------------------------------------------------------------------------------------------------------------------------------------------------------------------------------------------|------------------------------------------------------------------------------------------------------------------|-------------------------------------------------------------------------------------------------------------------|
|       |       |                           |         |         |             |           |          |                                 |                                                                                                                                                                                                                                                                                                                                                                                                                                                                                                                                                                    |                                                                                                                  | protein binding    GO:0005524:ATP binding                                                                         |
| TXNIP | 10628 | chr1:145438461-1454442628 | 119.403 | 38.3675 | 3.112087053 | 0.0116484 | 0.999958 | thioredoxin interacting protein | GO:0000122:negative regulation of transcription from RNA polymerase II promoter    GO:0006351:transcription, DNA-dependent    GO:0006606:protein import into nucleus    GO:0007049:cell cycle    GO:0009612:response to mechanical stimulus    GO:0009749:response to glucose stimulus    GO:0030216:keratinocyte differentiation    GO:0032355:response to estradiol stimulus    GO:0032570:response to progesterone stimulus    GO:0035872:nucleotide-binding domain, leucine rich repeat containing receptor signaling pathway    GO:0042127:regulation of cell | GO:0005634:nucleus    GO:0005737:cytoplasm    GO:0005758:mitochondrial intermembrane space    GO:0005829:cytosol | GO:0004857:enzyme inhibitor activity    GO:0005515:protein binding    GO:0031625:ubiquitin protein ligase binding |

|       |       |                                 |         |        |             |           |          |                                       |                                                                                                                                                                                                                                                                                                                                                                                                                                                                    |                                                          |                                                                          |
|-------|-------|---------------------------------|---------|--------|-------------|-----------|----------|---------------------------------------|--------------------------------------------------------------------------------------------------------------------------------------------------------------------------------------------------------------------------------------------------------------------------------------------------------------------------------------------------------------------------------------------------------------------------------------------------------------------|----------------------------------------------------------|--------------------------------------------------------------------------|
|       |       |                                 |         |        |             |           |          |                                       | <p>proliferation   </p> <p>GO:0042493:response to drug   </p> <p>GO:0042542:response to hydrogen peroxide   </p> <p>GO:0043065:positive regulation of apoptotic process   </p> <p>GO:0045087:innate immune response   </p> <p>GO:0048008:platelet-derived growth factor receptor signaling pathway   </p> <p>GO:0051592:response to calcium ion   </p> <p>GO:0051782:negative regulation of cell division   </p> <p>GO:0071228:cellular response to tumor cell</p> |                                                          |                                                                          |
| BRMS1 | 25855 | chr11:66<br>104803-6<br>6112582 | 47.0243 | 3.9689 | 11.84819471 | 0.0080737 | 0.999958 | breast cancer metastasis suppressor 1 | <p>GO:0006351:transcription, DNA-dependent   </p> <p>GO:0006915:apoptotic process   </p> <p>GO:0032088:negative regulation of NF-kappaB transcription factor activity   </p> <p>GO:0045892:negative regulation of transcription, DNA-dependent   </p>                                                                                                                                                                                                              | <p>GO:0005634:nucleus   </p> <p>GO:0005737:cytoplasm</p> | <p>GO:0005515:protein binding   </p> <p>GO:0051059:NF-kappaB binding</p> |

|     |      |                                 |         |         |             |            |          |          |                                                                                                                                                                                                                                                                                                                                                                                                                                                                                                         |                                                                                                                                                                                                                                                                                                                                            |                                                                                                                                                                                                                                                                |
|-----|------|---------------------------------|---------|---------|-------------|------------|----------|----------|---------------------------------------------------------------------------------------------------------------------------------------------------------------------------------------------------------------------------------------------------------------------------------------------------------------------------------------------------------------------------------------------------------------------------------------------------------------------------------------------------------|--------------------------------------------------------------------------------------------------------------------------------------------------------------------------------------------------------------------------------------------------------------------------------------------------------------------------------------------|----------------------------------------------------------------------------------------------------------------------------------------------------------------------------------------------------------------------------------------------------------------|
|     |      |                                 |         |         |             |            |          |          | GO:0090312:positive regulation of protein deacetylation   <br>GO:2000210:positive regulation of anoikis                                                                                                                                                                                                                                                                                                                                                                                                 |                                                                                                                                                                                                                                                                                                                                            |                                                                                                                                                                                                                                                                |
| VCL | 7414 | chr10:75<br>757871-7<br>5879914 | 35.7643 | 12.5256 | 2.855296353 | 0.00804989 | 0.999952 | vinculin | GO:0002009:morphogenesis of an epithelium   <br>GO:0002576:platelet degranulation   <br>GO:0006928:cellular component movement   <br>GO:0006936:muscle contraction    GO:0007155:cell adhesion   <br>GO:0007160:cell-matrix adhesion    GO:0007596:blood coagulation   <br>GO:0030032:lamellipodium assembly   <br>GO:0030168:platelet activation    GO:0030336:negative regulation of cell migration   <br>GO:0034333:adherens junction assembly   <br>GO:0034394:protein localization to cell surface | GO:0001725:stress fiber   <br>GO:0005576:extracellular region   <br>GO:0005829:cytosol   <br>GO:0005856:cytoskeleton   <br>GO:0005884:actin filament   <br>GO:0005886:plasma membrane   <br>GO:0005911:cell-cell junction   <br>GO:0005912:adherens junction   <br>GO:0005913:cell-cell adherens junction   <br>GO:0005916:fascia adherens | GO:0002162:dystroglycan binding   <br>GO:0003779:actin binding   <br>GO:0005198:structural molecule activity   <br>GO:0005515:protein binding   <br>GO:0008013:beta-catenin binding   <br>GO:0017048:Rho GTPase binding   <br>GO:0045294:alpha-catenin binding |

|  |  |  |  |  |  |  |  |  |                                                                                          |                                                                                                                                                                                                                |                                    |
|--|--|--|--|--|--|--|--|--|------------------------------------------------------------------------------------------|----------------------------------------------------------------------------------------------------------------------------------------------------------------------------------------------------------------|------------------------------------|
|  |  |  |  |  |  |  |  |  | GO:0043297:apical junction<br>assembly   <br>GO:0090136:epithelial cell-cell<br>adhesion | GO:0005925:focal<br>adhesion   <br>GO:0005925:focal<br>adhesion   <br>GO:0030055:cell-su<br>bstrate junction   <br>GO:0043034:costam<br>ere   <br>GO:0043034:costam<br>ere   <br>GO:0043234:protein<br>complex | GO:0045296:<br>cadherin<br>binding |
|--|--|--|--|--|--|--|--|--|------------------------------------------------------------------------------------------|----------------------------------------------------------------------------------------------------------------------------------------------------------------------------------------------------------------|------------------------------------|

**Supplementary Table 4 The expression level of ER $\alpha$  was positively correlated with the vinculin expression level in the primary tumor**

|             | Primary tumor | Vinculin |    |    |     | Total |
|-------------|---------------|----------|----|----|-----|-------|
|             |               | -        | +  | ++ | +++ |       |
| ER $\alpha$ | +             | 5        | 19 | 8  | 3   | 35    |
|             | ++            | 1        | 17 | 26 | 5   | 49    |
|             | +++           | 1        | 5  | 9  | 25  | 40    |
|             | Total         | 7        | 41 | 43 | 33  | 124   |

Spearman rank correlation analysis was used. ( $P < 0.001$ ,  $R^2 = 0.528$ )

**Supplementary Table 5 The expression level of ER $\alpha$  was positively correlated with the vinculin expression level in the lymph node metastasis**

|             | lymphatic metastasis | Vinculin |    |    |     | Total |
|-------------|----------------------|----------|----|----|-----|-------|
|             |                      | -        | +  | ++ | +++ |       |
| ER $\alpha$ | -                    | 17       | 28 | 13 | 10  | 68    |
|             | +                    | 3        | 13 | 4  | 1   | 21    |
|             | ++                   | 0        | 3  | 11 | 4   | 18    |
|             | +++                  | 1        | 3  | 3  | 10  | 17    |
|             | Total                | 21       | 47 | 31 | 25  | 124   |

Spearman rank correlation analysis was used. ( $P < 0.001$ ,  $R^2 = 0.366$ )

**Supplementary Table 6 The sequence of ER $\alpha$  siRNAs**

| <b>ID</b>        | <b>sense ( 5'-3' )</b>      | <b>antisense ( 5'-3' )</b>  |
|------------------|-----------------------------|-----------------------------|
| ESR1-homo-1      | 5' CAGGCCAAAUCAGAUAAUTT 3'  | 5' AUUAUCUGAAUUUGGCCUGTT 3' |
| ESR1-homo-2      | 5' GGUCCACCUUCUAGAAUGUTT 3' | 5' ACAUUCUAGAAGGUGGACCTT 3' |
| ESR1-homo-3      | 5' GAGGGAGAAUGUUGAAACATT 3' | 5' UGUUUCAACAUUCUCCCUCTT 3' |
| Negative control | 5' UUCUCCGAACGUGUCACGUTT 3' | 5' ACGUGACACGUUCGGAGAATT 3' |

**Supplementary Table 7 The sequence of vinculin shRNAs**

| <b>ID</b>     | <b>5'</b>  | <b>stem</b>           | <b>loop</b> | <b>stem</b>           | <b>3'</b> |
|---------------|------------|-----------------------|-------------|-----------------------|-----------|
| VCL-RNAi(1)-a | Ccgg       | gcACAGATAAACGGATTAGAA | CTCGAG      | TTCTAATCCGTTTATCTGTGC | TTTTTg    |
| VCL-RNAi(1)-b | aattcaaaaa | gcACAGATAAACGGATTAGAA | CTCGAG      | TTCTAATCCGTTTATCTGTGC |           |
| VCL-RNAi(2)-a | Ccgg       | ccCTGGAAATCAAGCTGCTTA | CTCGAG      | TAAGCAGCTTGATTCCAGGG  | TTTTTg    |
| VCL-RNAi(2)-b | aattcaaaaa | ccCTGGAAATCAAGCTGCTTA | CTCGAG      | TAAGCAGCTTGATTCCAGGG  |           |
| VCL-RNAi(3)-a | Ccgg       | cgGTTGGTACTGCTAATAAAT | CTCGAG      | ATTTATTAGCAGTACCAACCG | TTTTTg    |
| VCL-RNAi(3)-b | aattcaaaaa | cgGTTGGTACTGCTAATAAAT | CTCGAG      | ATTTATTAGCAGTACCAACCG |           |
| VCL-RNAi(4)-a | Ccgg       | gcTCGAGATTATCTAATTGAT | CTCGAG      | ATCAATTAGATAATCTCGAGC | TTTTTg    |
| VCL-RNAi(4)-b | aattcaaaaa | gcTCGAGATTATCTAATTGAT | CTCGAG      | ATCAATTAGATAATCTCGAGC |           |

**Supplementary Table 8 The sequence of relative sgRNA**

| <b>sgRNA</b> | <b>sequence</b>      |
|--------------|----------------------|
| ESR1         | CCATCCCAGATGCTTTGGTG |
| VCL          | CCTGCTCCTTACCTTCGATG |

**Supplementary Table 9 The sequence of primer sets flanking related putative ER $\alpha$  binding sites in the promoter region of vinculin**

| <b>ID</b> | <b>sense ( 5'-3' )</b>        | <b>antisense ( 5'-3' )</b>    |
|-----------|-------------------------------|-------------------------------|
| Primer 1  | 5' GTT CAC GCC ATT GTC CTG 3' | 5' TTA TCC AGT TCC CTC ACG 3' |
| Primer 2  | 5' CAA CCC AAG TCC ATG AGT 3' | 5' CTG GGT GTG TAG CCT TCT 3' |
| Primer 3  | 5' GTT TAC GTG AAT GGG ACG 3' | 5' GTT TGA TGA GAC CAA GGG 3' |
| Primer 4  | 5' GAG CAT CTC GAA AAG GGA 3' | 5' AGA GAC AGA CTG TGC AGC 3' |

**Supplementary Table 10 The sequence of primer sets for real-time PCR assay**

| <b>ID</b> | <b>Forward ( 5'-3' )</b>   | <b>Reverse ( 5'-3' )</b>    |
|-----------|----------------------------|-----------------------------|
| ESR1      | 5' TCTTGGACAGGAACCAGGGA 3' | 5' CAGAGACTTCAGGGTGCTGG 3'  |
| Vinculin  | 5' CACCGTGAAAGAGTTGCTGC 3' | 5' TGGCTTCAGTGTCCCTTGCTG 3' |
| GAPDH     | 5' GTCAAGGCTGAGAACGGGAA 3' | 5' AAATGAGCCCCAGCCTTCTC 3'  |
